# Supplementary material for: A highly efficient silver niobium alumina catalyst for the selective catalytic reduction of NO by n-decane
Source: Royal Society of Chemistry journal article supplement (doi:10.1039/c1cc12792f), 2011-01-01
Supplement: c1cc12792f.pdf [file c1cc12792f.pdf]

# Highly Efficient Silver Niobium Alumina Catalyst for the Selective Catalytic Reduction of NO by *n*-Decane: Detailed Experimental Part

Carolina Petitto,<sup>a,b</sup> Hubert P Mutin<sup>b</sup> and Gérard Delahay<sup>\*a</sup>

## 5 Catalyst Preparation

### Preparation of Ag<sub>CAL823</sub>

0.0664 g of silver chloride and 6.400 g of aluminium chloride are added, under inert atmosphere, to a solution of dichloromethane (10 cm<sup>3</sup>) and isopropyl ether (10.2 cm<sup>3</sup>).  
10 Then the reaction mixture was charged into a 130 cm<sup>3</sup> stainless steel autoclave equipped with a glass liner. The autoclave is then placed into the drying oven and kept at 383 K for 6 days. After this ageing, the gel was washed with CH<sub>2</sub>Cl<sub>2</sub> and dried under vacuum firstly at room temperature  
15 and then at 393 K. The sample was calcined at 823 K under air flow for 8 hours.

### Preparation of AgNb<sub>CAL823</sub>

0.0664 g of silver chloride, 0.127 g of niobium chloride (V)  
20 and 6.234 g of aluminium chloride are added, under inert atmosphere, to a solution of dichloromethane (10 cm<sup>3</sup>) and isopropyl ether (10.1 cm<sup>3</sup>). Then the reaction mixture was charged into a 130 cm<sup>3</sup> stainless steel autoclave equipped with a glass liner. The autoclave is then placed into the drying oven  
25 and kept at 383 K for 6 days. After this ageing, the gel was washed with CH<sub>2</sub>Cl<sub>2</sub> and dried under vacuum firstly at room temperature and then at 393 K. The sample was calcined at 823 K under air flow for 8 hours.

### 30 Preparation of Ag<sub>HDT1023</sub> and AgNb<sub>HDT1023</sub>

1g of AgNb<sub>CAL823</sub> or 1g of AgNb<sub>CAL823</sub> is set on a porous fritte of a U tube quartz reactor in which an air flow of 50 cm<sup>3</sup>/min passes through. Then, the reactor is heated at 1023 K with a ramp of 6 K/min and kept at this temperature for 16 hours and  
35 then cooled to room temperature. The injection of H<sub>2</sub>O<sub>liq.</sub> (0.0041 cm<sup>3</sup>/min), by a syringe-pump, is started during the ramp of temperature when the temperature of the sample is around 373 K. The injection of water is stopped during the cooling of the furnace once the temperature is below 673 K.

## 40 Catalytic Test Reaction

The SCR of NO by *n*-decane was performed in a flow reactor operating at atmospheric pressure. An aliquot (0.040 g) of the powdered catalyst was placed in a reactor and pretreated in  
45 situ at 823 K for 1 h in air. After cooling to 473 K, the reaction was performed using a gas mixture containing 0.04 vol% NO (purity >99.995%), 0.02 vol% *n*-decane (purity >99.5%), 2.5 vol% H<sub>2</sub>O (purity >99.5%) and 8 vol% O<sub>2</sub> (purity >99.995%), the balance with helium. The total flow  
50 rate was 100 cm<sup>3</sup>/min (space velocity: 150,000 h<sup>-1</sup>) and the temperature was varied from 473 to 823 K (ramp: 5 K/min).

The composition of the effluents was monitored continuously by sampling on line to a quadrupole mass spectrometer (Pfeiffer Vacuum) equipped with Faraday and SEM detectors  
55 (0–200 amu) and following the masses 28, 30, 44, 46, and 57. The possible N<sub>2</sub>O and CO formations were checked by analysing the outlet gas with a two module micro gas chromatograph (CP-4900 Micro-GC Varian), each module being equipped with a thermal conductivity detector (TCD).  
60 The first module has a 5 Å molecular sieve column, allowing the analysis of O<sub>2</sub>/N<sub>2</sub>/CO/CH<sub>4</sub> and a back flush system to send the heavy products and CO<sub>2</sub> towards the second module. The latter has a PORAPLOT Q column in order to separate CO<sub>2</sub> and N<sub>2</sub>O. With the CP-4900 μGC, a sample analysis of the gas  
65 phase, which injection is performed through a system capillary/micro-pump, can be realised every 20 K
